# Supplementary material
Source: MDPI journal article supplement (https://www.mdpi.com/2311-5637/8/10/498)
Supplement: s1 [file s1]

**TABLE S1.** strains and plasmids used in this study

| strain and plasmid                                    | description                                                                 | source or reference |
|-------------------------------------------------------|-----------------------------------------------------------------------------|---------------------|
| <i>E. coli</i> JM109                                  | cloned host                                                                 | laboratory stock    |
| <i>B. subtilis</i> 168                                | expression host                                                             | laboratory stock    |
| <i>B. subtilis</i> 168/pMA5- <i>gsj</i>               | <i>B. subtilis</i> 168 derivative with pMA5- <i>gsj</i> , Kanr              | this work           |
| <i>B. subtilis</i> 168/pMA5- <i>agl</i>               | <i>B. subtilis</i> 168 derivative with pMA5- <i>agl</i> , Kanr              | this work           |
| <i>B. subtilis</i> 168/pMA5-SpyTag-AGL-SpyCatcher     | <i>B. subtilis</i> 168 derivative with pMA5-SpyTag-AGL-SpyCatcher, Kanr     | this work           |
| <i>B. subtilis</i> 168/pMA5-SnoopTag-AGL-SnoopCatcher | <i>B. subtilis</i> 168 derivative with pMA5-SnoopTag-AGL-SnoopCatcher, Kanr | this work           |
| <i>B. subtilis</i> 168/pMA5-SdyTag-AGL-SdyCatcher     | <i>B. subtilis</i> 168 derivative with pMA5-SdyTag-AGL-SdyCatcher, Kanr     | this work           |
| <i>B. subtilis</i> 168/pMA5- RIAD-AGL-RIDD            | <i>B. subtilis</i> 168 derivative with pMA5-RIAD-AGL-RIDD, Kanr             | this work           |
| pMA5- <i>gsj</i>                                      | Recombinant vector containing <i>gsj</i>                                    | this work           |
| pMA5- <i>agl</i>                                      | Recombinant vector containing <i>agl</i>                                    | this work           |
| pMA5-SpyTag-AGL-SpyCatcher                            | Recombinant vector SpyTag- <i>agl</i> -SpyCatcher                           | this work           |
| pMA5-SnoopTag-AGL-SnoopCatcher                        | Recombinant vector SnoopTag- <i>agl</i> -SnoopCatcher                       | this work           |
| pMA5-SdyTag-AGL-SdyCatcher                            | Recombinant vector SdyTag- <i>agl</i> -SdyCatcher                           | this work           |
| pMA5- RIAD-AGL-RIDD                                   | Recombinant vector RIAD- <i>agl</i> -RIDD                                   | this work           |

**TABLE S2.** Primers used to construct the cyclized proteins

| Primer    | sequence (5'→3')                                                                                                 |
|-----------|------------------------------------------------------------------------------------------------------------------|
| Spy-F     | GGTCGATGCATATAAACCCACCAAAGGTGGTGGTGGTTCAGG<br>TGGTGGTGGTTCAGGTGGTGGTGGTTCAGTGTATCAGAAAACG<br>AGCGAAAAAATTG       |
| Spy-R     | ACTTTTGCATTCTACAAACTGCATAACTTTAGATGTGCGCATC<br>GCCTT                                                             |
| Snoop-F   | AAACTGGGCGATATTGAATTTATTAAAGTGAACAAAGGTGGT<br>GGTGGTTCAGGTGGTGGTGGTTCAGGTGGTGGTGGTGTGGTC<br>TGTATCAGAAAACGAGCGAA |
| Snoop-R   | TTTGCATTCTACAAACTGCATAACTTTATTTCCGGCGGTATCGGT<br>TCATT                                                           |
| Sdy-F     | GACCCGATCGTTATGATCGATAACGATAAACCCATCACCGGT<br>GGTGGTGGTTCAGGTGGTGGTGGTTCAGGTGGTGGTGGTGTG<br>GTCTGTATCAGAAA<br>T  |
| Sdy-R     | TTGCATTCTACAAACTGCATAACTTTAGGAATCCACCCAGATC<br>TGACC                                                             |
| AD-F      | ACATATGCATCATCATCATCACGGTGGTGGTGGCTCCGGC<br>GGTGGCGGTTCTGGTGGTGGTGGCTCCCTGGAACAGTATGCA<br>AATCA                  |
| AD-R      | GCATTCTACAAACTGCATAACTTTATTTGGCTTCTTCTTTTCC<br>AGACG                                                             |
| SpyK11A-F | TATGGTCGATGCATATGCACCCACCAA                                                                                      |
| SpyK11A-R | TTTGGTGGGTGCATATGCATCGACCATA                                                                                     |

**TABLE S3.** Amino acid sequence of cyclized protein

| Protein              | sequence (N-terminal → C-terminal)                                                                                                                                                                                                                                                                                                                                                                                                                                                                                                                                                                                                                                                                                         |
|----------------------|----------------------------------------------------------------------------------------------------------------------------------------------------------------------------------------------------------------------------------------------------------------------------------------------------------------------------------------------------------------------------------------------------------------------------------------------------------------------------------------------------------------------------------------------------------------------------------------------------------------------------------------------------------------------------------------------------------------------------|
| SpyTag-AGL-SpyCather | MAHIVMVDAYKPTKGGGSGGGSGGGSLYQKTSEKIVVRNEGKKLEL<br>RVLGDKIINVFVSNKEEKRKDTIAIERKEYDTPFESISDELESILIETNSLKVKI<br>NKNDLSVSFLDKNGNIINEDYNGGAKFNETDVRCYKKLREDHFGFGEKA<br>GYLDKKGERLEMWNTDEFMTHNQTTKLLYESYPFFIGMNDYHTYGIFLDN<br>SFRSFFDMGQESQEYFFGAYGGQMNYFYIGEDIKEVVENYTYLTGRISL<br>PPLWVLGNQQSRYSTPQERVLEVAKTFREKDIPCDVIYLDIDYMEGYRVF<br>TWNKETFKNHKEMLKQLKEMGFKVVTIVDPGVKRDYDYHVYREGIEKGY<br>FVKDKYGITYVGKVWPGEACFPDFLQEEVRYWWGEKHHREFINDGIDGIWN<br>DMNEPAVFETPTKTPEDNIHILDGEKVLHKEAHNVYANYMAMATRDGFL<br>RIRPNERPFVLTRAASFSGIQRYAAMWTGDNRSLYEHLMMMPMLMNIGLS<br>GQPFVGADVGGFEGDCHEELFIRWIEAAVFTPFLRVHSAIGTKDQEPWSFG<br>KRAEDISRKYIKMRYELLPYLYDLFYIASQKGYPIMRPLVFYEQKDENTHKI<br>YDEFMFGEGLLVAPVYLPSEKREVVYLPEGIWYDYWTGKGFKGKNYYLV |

|                          |                                                                                                                                                                                                                                                                                                                                                                                                                                                                                                                                                                                                                                                                                                                                                                                                                                                                                                                                                                                                                                      |
|--------------------------|--------------------------------------------------------------------------------------------------------------------------------------------------------------------------------------------------------------------------------------------------------------------------------------------------------------------------------------------------------------------------------------------------------------------------------------------------------------------------------------------------------------------------------------------------------------------------------------------------------------------------------------------------------------------------------------------------------------------------------------------------------------------------------------------------------------------------------------------------------------------------------------------------------------------------------------------------------------------------------------------------------------------------------------|
|                          | DAPIEVIPLFVKEGGILLKQQPQSFIGEKKLEELTVEIYKGKEGHYLYHYEDD<br>GKSFDYTKGVYNLFDISFCYKEGRMDIKFDKIHFGYDKGVKKYKFIFKNFD<br>DIKEIKINGEKVEKESCEIELGGGSGGGSGGGGSVDTL SGLSSEQGQSGD<br>MTIEE SATHIKFSKRDEDGKELAGATMELRDSSGKTISTWISDGQVKDFYL<br>YPGKYTFVETAAPDGYEVATAITFTVNEQQQVTVNGKATKGDAHI                                                                                                                                                                                                                                                                                                                                                                                                                                                                                                                                                                                                                                                                                                                                                         |
| SnoopTag-AGL-SnoopCather | MKLGDIIEFIKVNKQHPDYPDIYGAIDQ NHGGGSGGGSGGGGS LYQKTS<br>EKIVVRNEGKKLELRVLGDKIINVFSNKEEKRKDTIAIERKEYDTPEFSISD<br>ELESILIETNSLKV KINKNDLSVSFLDKNGNIINEDYNGGAKFNETDVRCYK<br>KLREDHFYGFGEKAGYLDKKGERLEMWNTDEFMTHNQTTKLLYESYPFFI<br>GMNDYHTYGIFLDNSFRSFFDMGQESQEYFFGAYGGQMNYFYIYGEDIK<br>EVVENYTYLTGRISLPPLWVLGNQQSRYSYTPQERVLEVAKTFREKDIPCDV<br>IYLDIDYMEGYRVFTWNKETFKNHKEMLKQLKEMGFKVVTIVDPGVKRD<br>YDYHVYREGIEKGYFVKDKYGITYVGKVWPGEACFPDFLQEEVRYWWGE<br>KHREFINDGIDGIWNDMNEPAVFETPTKTPEDNIHILDGEKVLHKEAHNV<br>YANYMAMATRDGFLRIRPNERPFVLTRAAFSGIQRYAAMWTGDNRSLEYH<br>LLMMMPMLMNIGLSGQPFVGADVGGFEGDCHEELFIRWIEAAVFTPFLRV<br>HSAIGTKDQEPWSFGKRAEDISRKYIKMRYELLPYLYDLFYIASQKGYPIMR<br>PLVFEYQKDENTHKIYDEFMFGEGLLVAPVYLPSKERREVYLPEGIWYDYW<br>TGKGFKGKNYYLVD APIEVIPLFVKEGGILLKQQPQSFIGEKKLEELTVEIYK<br>GKEGHYLYHYEDDGKSFDYTKGVYNLFDISFCYKEGRMDIKFDKIHFGYDK<br>GVKKYKFIFKNFDDIKEIKINGEKVEKESCEIELGGGSGGGSGGGGS KPL<br>RGAVFSLQKQHPDYPDIYGAIDQNTYQNVRTGEDGKLTFKNLSDGKYRL<br>FENSEPAGYKPVQNKPIVAFQIVNGEVRDVT SIVPQDIPATYEFTNGKH YITN<br>EIPPPK |
| SdyTag-AGL-SdyCather     | MDPIVMIDNDKPITGGGSGGGSGGGGS LYQKTSEKIVVRNEGKKLELRV<br>LGDKIINVFSNKEEKRKDTIAIERKEYDTPEFSISDELESILIETNSLKV KINK<br>NDLSVSFLDKNGNIINEDYNGGAKFNETDVRCYK KLREDHFYGFGEKAGY<br>LDKKGERLEMWNTDEFMTHNQTTKLLYESYPFFIGMNDYHTYGIFLDNSF<br>RSFFDMGQESQEYFFGAYGGQMNYFYIYGEDIKEVVENYTYLTGRISLP<br>LWVLGNQQSRYSYTPQERVLEVAKTFREKDIPCDVIYLDIDYMEGYRVFTW<br>NKETFKNHKEMLKQLKEMGFKVVTIVDPGVKRDYDYHVYREGIEKGYFV<br>KDKYGITYVGKVWPGEACFPDFLQEEVRYWWGEKHREFINDGIDGIWND<br>MNEPAVFETPTKTPEDNIHILDGEKVLHKEAHNVYANYMAMATRDGFLR<br>IRPNERPFVLTRAAFSGIQRYAAMWTGDNRSLEYHLLMMMPMLMNIGLSG<br>QPFVGADVGGFEGDCHEELFIRWIEAAVFTPFLRVHSAIGTKDQEPWSFGK<br>RAEDISRKYIKMRYELLPYLYDLFYIASQKGYPIMRPLVFEYQKDENTHKIY<br>DEFMFGEGLLVAPVYLPSKERREVYLPEGIWYDYWTGKGFKGKNYYLVD<br>APIEVIPLFVKEGGILLKQQPQSFIGEKKLEELTVEIYKGKEGHYLYHYEDDG<br>KSFDYTKGVYNLFDISFCYKEGRMDIKFDKIHFGYDKGVKKYKFIFKNFDD<br>IKEIKINGEKVEKESCEIELGGGSGGGSGGGGSLSGETGQSGNTTIEEDST<br>THVN KFSKRDANGKELAGAMIELRNLSGQTIQSWISDGT VKVFYLMPGTY<br>QFVETA APEGYELAAPITFTIDEKGQIWVDS                                   |

Different colors represent different parts of the protein: Tag (green), yellow (3×GGGS), red (AGL), blue (catcher), purple (location of the iso peptide bond).

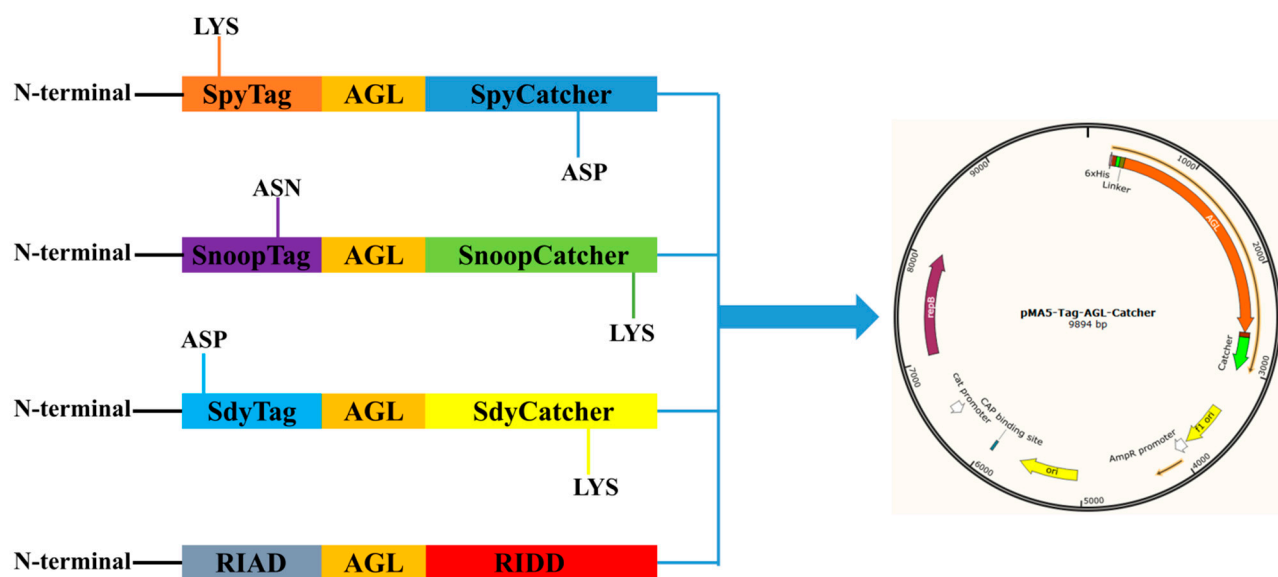

**Figure S1.** Construction of recombinant plasmids for cyclized AGL.

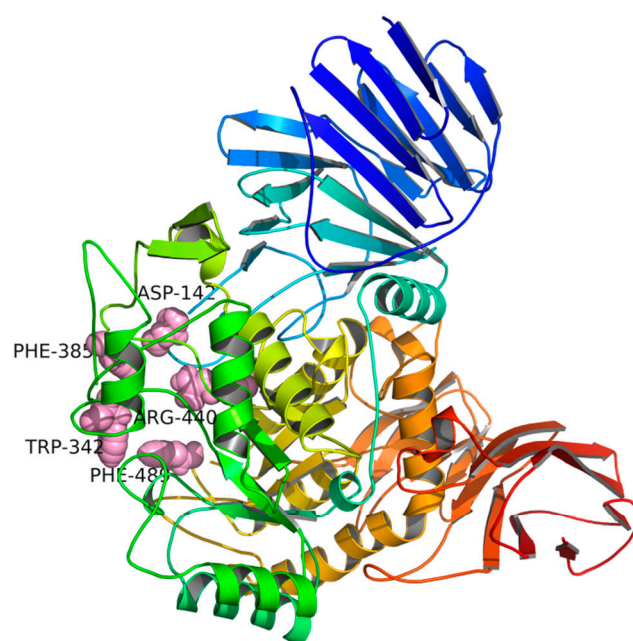

**Figure S2.** Three-dimensional structure of wild-type AGL (the pink spheres highlight the enzyme active sites).

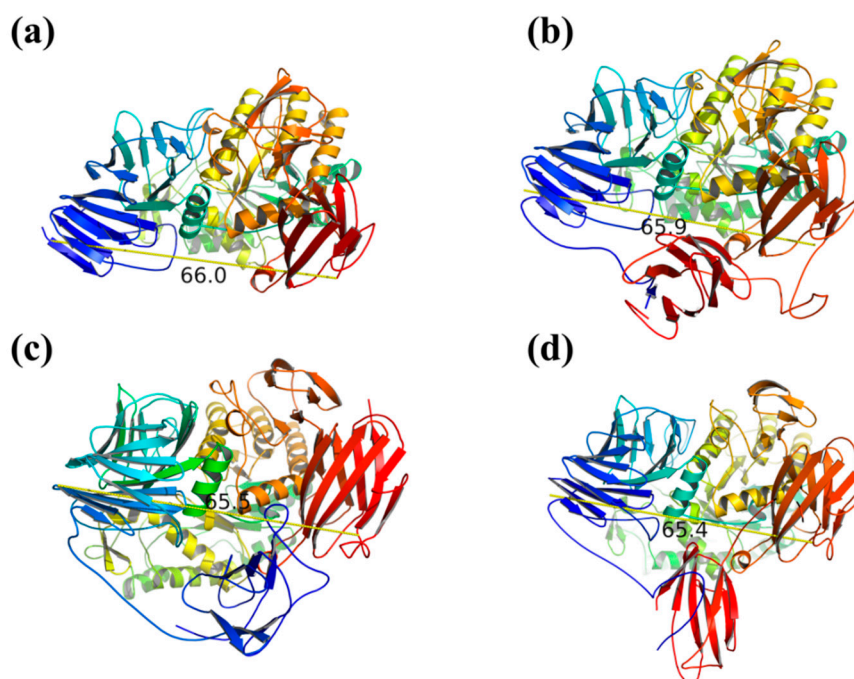

**Figure S3.** The distance between the terminals. (a) wild-type AGL, (b) SpyTag-AGL-SpyCatcher, (c) SnoopTag-AGL-SnoopCatcher, (d) SdyTag-AGL-SdyCatcher

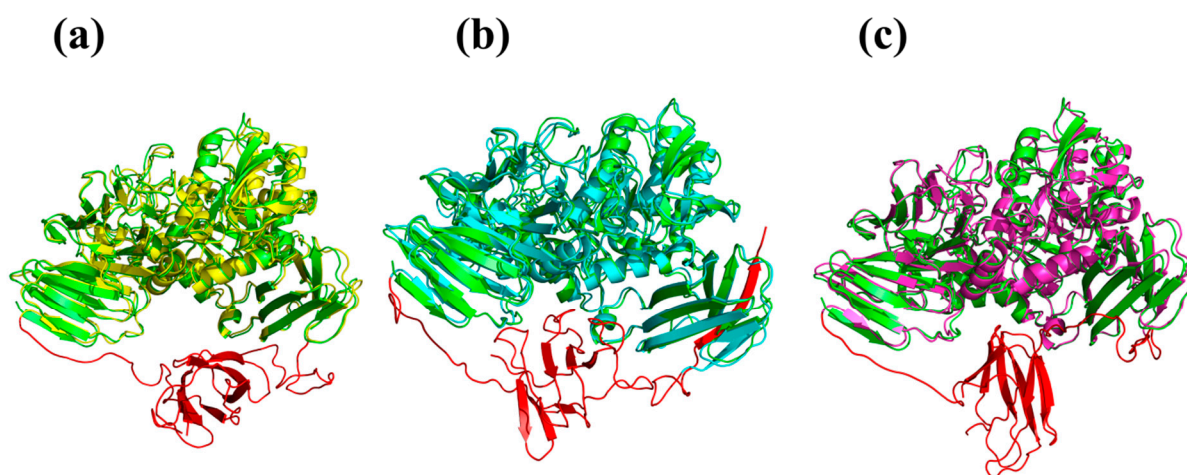

**Figure S4.** Structural alignment of cyclized AGL with wild-type. The 3D structure of wild-type (green) was aligned with SpyTag-AGL-SpyCatcher (yellow), SnoopTag-AGL-SnoopCatcher (blue) and SdyTag-AGL-SdyCatcher (purple) respectively. Also, the non-overlapping part (red) represents Catcher/Tag system.
